# Supplementary material
Source: PubMed Central journal article supplement (PMC5488704)
Supplement: NIHMS862275-supplement-supplement_1.pdf [file NIHMS862275-supplement-supplement_1.pdf]

Supplemental Table 1

**Description of CVLT indices (Table adapted from Delis et al., 1988)**

| CVLT categories                  | Description                                                                                                                                                |
|----------------------------------|------------------------------------------------------------------------------------------------------------------------------------------------------------|
| List A total recall              | Total number of List A words recalled across Trials 1-5                                                                                                    |
| Semantic Cluster Ratio           | Ratio of List A words from the same category recalled together over chance-expected semantic clustering given the number of words and categories recalled. |
| Serial Clustering                | Ratio of List A words recalled in the same order as they were presented over chance-expected serial clustering given the number of words recalled.         |
| Percent Primacy Recall           | Percentage of total words recalled that are from the primary region of List A (first four words).                                                          |
| Percent Recency Recall           | Percentage of total words recalled that are from the recency region of List A (last four words).                                                           |
| Consistency of item recall       | Percentage of List A words recalled on one of the first four trials that are also recalled on the very next trial (i.e., Trials 2-5).                      |
| Learning Slope                   | Slope of a least-squares regression line calculated to fit changes in correct response scores across Trials 1-5.                                           |
| List B recall                    | Number of List B words recalled on the one immediate recall trial.                                                                                         |
| List B vs. List A trial 1 recall | Change in recall of List B relative to Trial 1 of List A; reflects vulnerability to proactive interference.                                                |
| Short delay free recall          | Number of List A words recalled when category names are provided.                                                                                          |
| Short delay vs. trial 5 recall   | Number of List A words recalled after a 20-min delay of nonverbal testing is interposed following the short delay cued recall trial.                       |
| Short delay cued recall          | Number of List A words recalled when category names are provided.                                                                                          |
| Long delay free recall           | Number of List A words recalled after a 20-min delay of nonverbal testing is interposed following the short delay cued recall trial.                       |
| Long delay cued recall           | Number of List A words recalled when category names are provided.                                                                                          |
| Recognition hits                 | Number of List A words identified on a yes/no recognition test that includes 28 distracter items.                                                          |
| False positives                  | Number of distracter items identified as List A items on the recognition test.                                                                             |
| Free recall intrusions           | Total number of non-target items reported on all free recall trials of List A and B.                                                                       |
| Cued recall intrusions           | Total number of non-target items reported on the two cued recall trials of List A.                                                                         |
| Perseverations                   | Total number of responses repeated on each trials summed across all free and cued recall trials of List A and B.                                           |
